# Supplementary material for: Oas1b-dependent Immune Transcriptional Profiles of West Nile Virus Infection in the Collaborative Cross
Source: PubMed Central journal article supplement (PMC5473748; doi:10.1534/g3.117.041624), 2017-06-05
Supplement: 1665CombinedSI.pdf [file 1665CombinedSI.pdf]

## Supplemental Figures

| Gene  | Chromosome | Position    | dbSNP                       | Reference | 129S1/SvImJ | A/J | CAST/EIJ | NOD/ShiLtJ | NZO/HILtJ | PWK/PhJ | WSB/EIJ |
|-------|------------|-------------|-----------------------------|-----------|-------------|-----|----------|------------|-----------|---------|---------|
| Oas1b | 5          | 120,812,834 | <a href="#">rs251166990</a> | C         | -           | -   | -        | -          | -         | F       | -       |
| Oas1b | 5          | 120,814,432 | <a href="#">rs32174891</a>  | G         | -           | -   | -        | -          | -         | F       | -       |
| Oas1b | 5          | 120,814,438 | <a href="#">rs32174892</a>  | G         | -           | -   | A        | -          | -         | -       | A       |
| Oas1b | 5          | 120,814,492 | <a href="#">rs255688476</a> | A         | -           | -   | -        | -          | -         | F       | -       |
| Oas1b | 5          | 120,814,493 | <a href="#">rs262618976</a> | G         | -           | -   | -        | -          | -         | A       | -       |
| Oas1b | 5          | 120,814,553 | <a href="#">rs32175796</a>  | G         | -           | -   | -        | -          | -         | A       | -       |
| Oas1b | 5          | 120,814,577 | <a href="#">rs245141195</a> | G         | -           | -   | -        | -          | -         | T       | -       |
| Oas1b | 5          | 120,814,599 | <a href="#">rs236207327</a> | C         | -           | -   | -        | -          | -         | G       | -       |
| Oas1b | 5          | 120,817,682 | <a href="#">rs261244139</a> | C         | -           | -   | -        | -          | -         | T       | -       |
| Oas1b | 5          | 120,817,703 | <a href="#">rs229326635</a> | C         | -           | -   | -        | -          | -         | T       | -       |
| Oas1b | 5          | 120,817,706 | <a href="#">rs257315331</a> | T         | -           | -   | -        | -          | -         | C       | -       |
| Oas1b | 5          | 120,817,724 | <a href="#">rs32176585</a>  | A         | -           | -   | G        | -          | -         | G       | G       |
| Oas1b | 5          | 120,817,738 | <a href="#">rs238326068</a> | A         | -           | -   | -        | -          | -         | T       | -       |
| Oas1b | 5          | 120,817,771 | <a href="#">rs32176586</a>  | C         | -           | -   | -        | -          | -         | -       | F       |
| Oas1b | 5          | 120,817,772 | <a href="#">rs32176587</a>  | G         | -           | -   | -        | -          | -         | A       | -       |
| Oas1b | 5          | 120,821,198 | -                           | A         | -           | -   | -        | -          | -         | a/t     | -       |
| Oas1b | 5          | 120,821,203 | -                           | A         | -           | -   | -        | -          | -         | a/c     | -       |
| Oas1b | 5          | 120,821,212 | -                           | G         | -           | -   | -        | -          | -         | g/a     | -       |
| Oas1b | 5          | 120,821,214 | -                           | C         | -           | -   | -        | -          | -         | c/g     | -       |
| Oas1b | 5          | 120,821,218 | -                           | C         | -           | -   | -        | -          | -         | c/g     | -       |
| Oas1b | 5          | 120,821,228 | -                           | A         | -           | -   | -        | -          | -         | a/g     | -       |
| Oas1b | 5          | 120,821,294 | -                           | C         | -           | -   | -        | -          | -         | c/t     | -       |
| Oas1b | 5          | 120,821,320 | -                           | G         | -           | -   | -        | -          | -         | g/a     | -       |
| Oas1b | 5          | 120,821,326 | -                           | G         | -           | -   | -        | -          | -         | g/a     | -       |
| Oas1b | 5          | 120,821,348 | <a href="#">rs32177514</a>  | A         | -           | -   | G        | -          | -         | G       | G       |

### SnP/Indel Consequences:

- x Missense variant
- x TF binding site variant
- \* Multiple consequences

### Base Calling examples:

- T High confidence call
- t Low confidence call
- High confidence reference (SNP)
- ~ Low confidence reference (SNP)
- Genotype not called

**Figure S1. SNPs in Oas1b founders.** A list of known single nucleotide polymorphisms found in the Oas1b region of chromosome 5. The table indicates which region had a variant and which of the eight founder strains contains that variant. Found with the Sanger SNP viewer: ([https://www.sanger.ac.uk/sanger/Mouse\\_SnpViewer](https://www.sanger.ac.uk/sanger/Mouse_SnpViewer)), (Keane et al., 2011),.

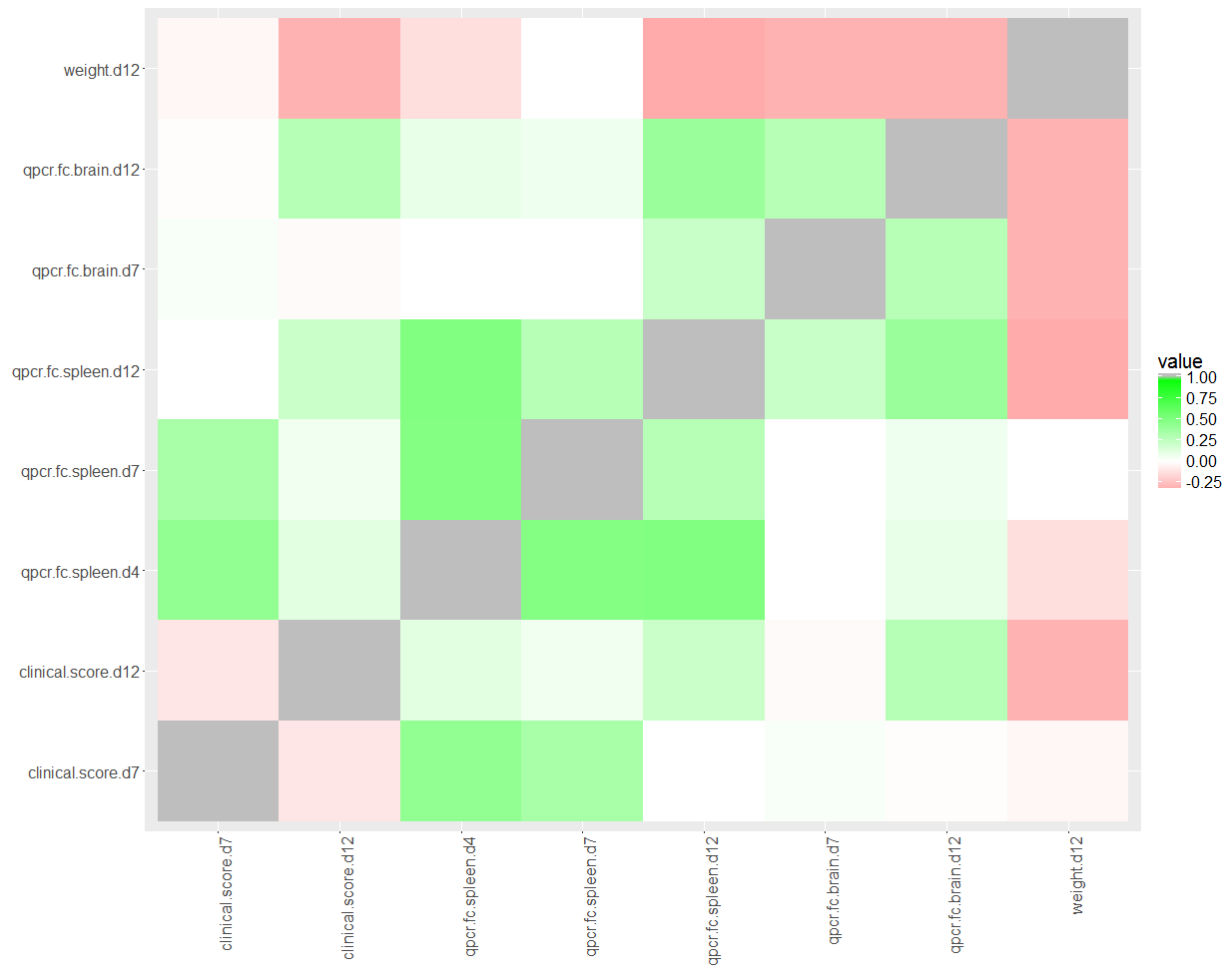

**Figure S2. Correlation heat map of phenotypes**

The heatmap shows the Pearson correlation scores representing relationships between phenotypes (clinical score, qPCR, and weight loss at day 12 post infection), with phenotypes represented on the X and Y axes. The green scale represents the value of positive correlation between phenotypes. The red scale represents negative correlation.

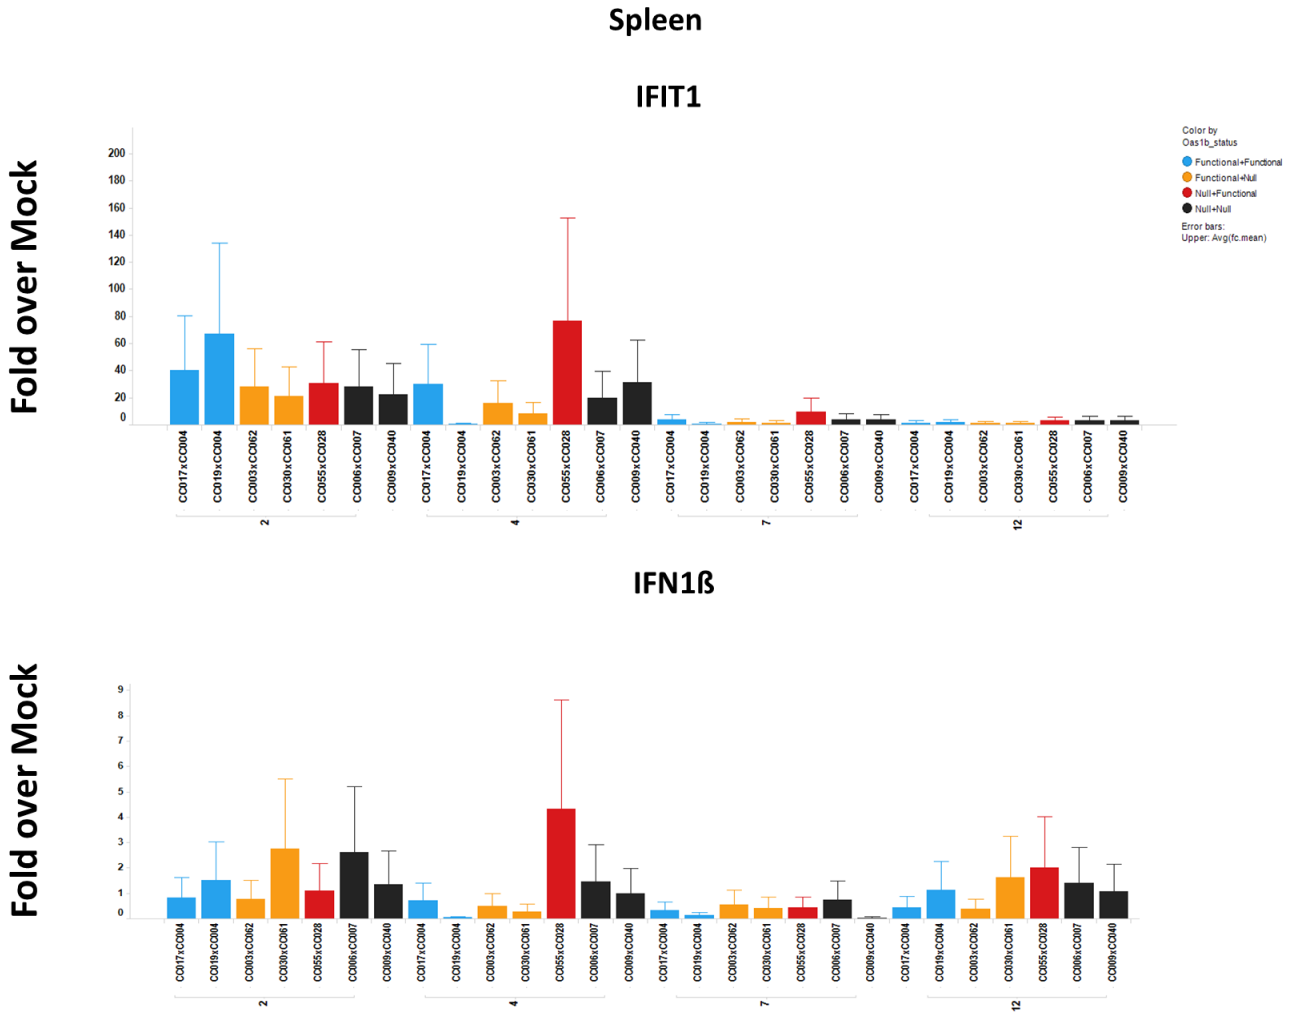

**Figure S3. qPCR for IFIT1 and IFN $\beta$ 1 in the spleen**

The y-axis shows fold change over mock averaged over each RIX background and the x-axis shows CC line IDs followed by days' post infection (2, 4, 7). Each color represents a different Oas1b designation. Blue=F/F, Orange=F/N, Red=N/F, Black=N/N.

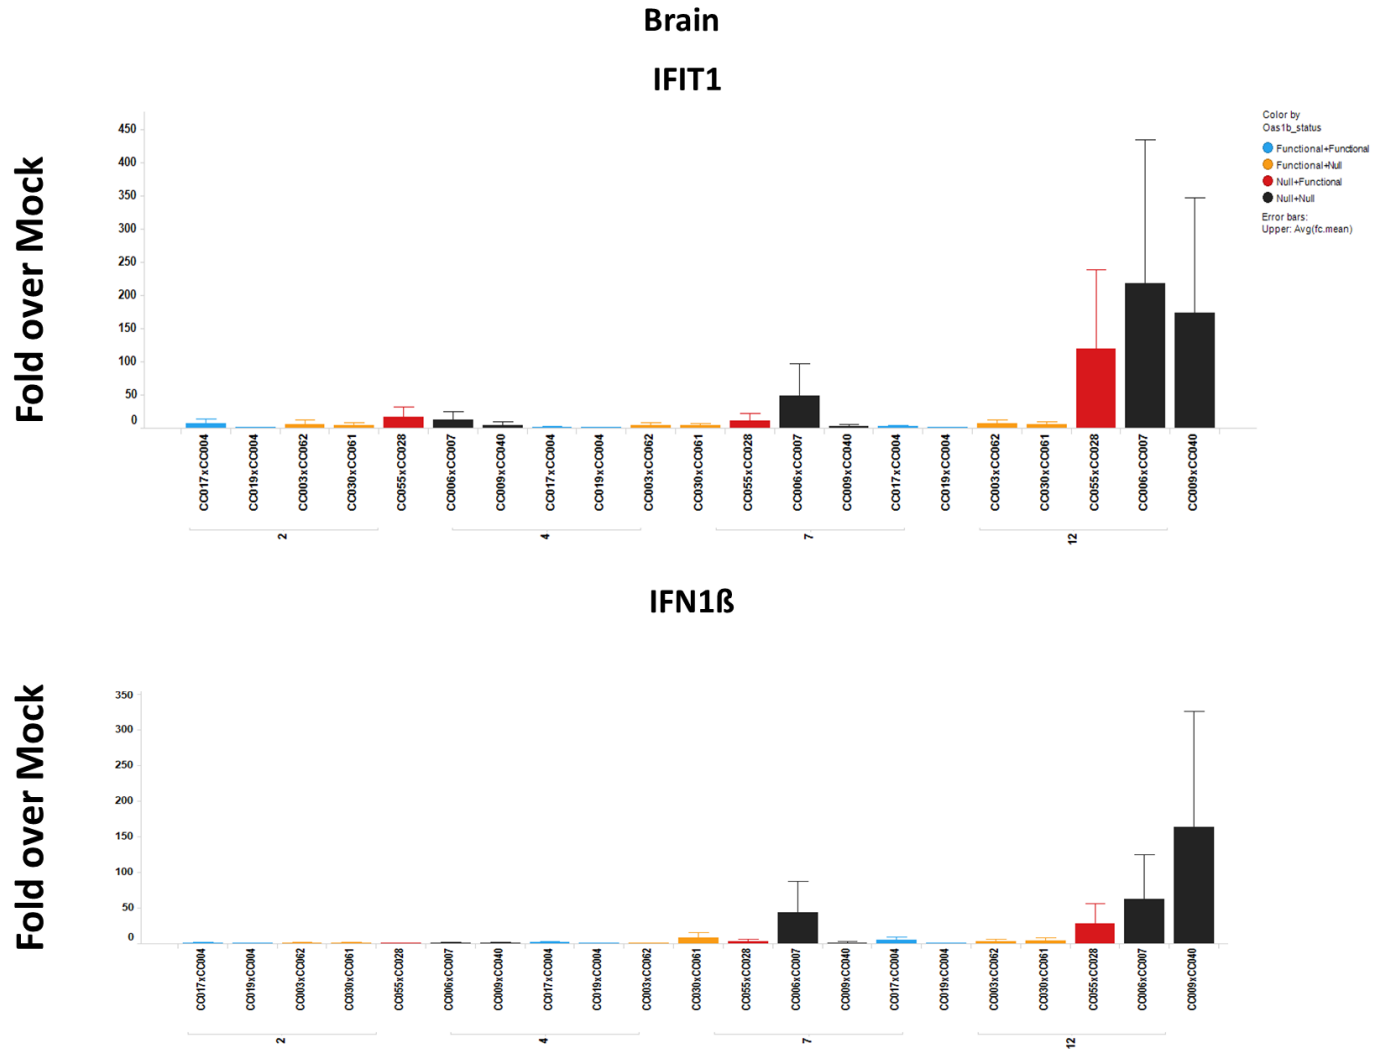

**Figure S4. qPCR for IFIT1 and IFNβ1 in the brain**

The y-axis shows fold change over mock in the RIX lines selected for transcriptomics. The x-axis shows CC line IDs followed by days' post infection (2, 4, 7). Each color represents a different Oas1b designation. Blue=F/F, Orange=F/N, Red=N/F, Black=N/N.

## CC(055x028)/F1

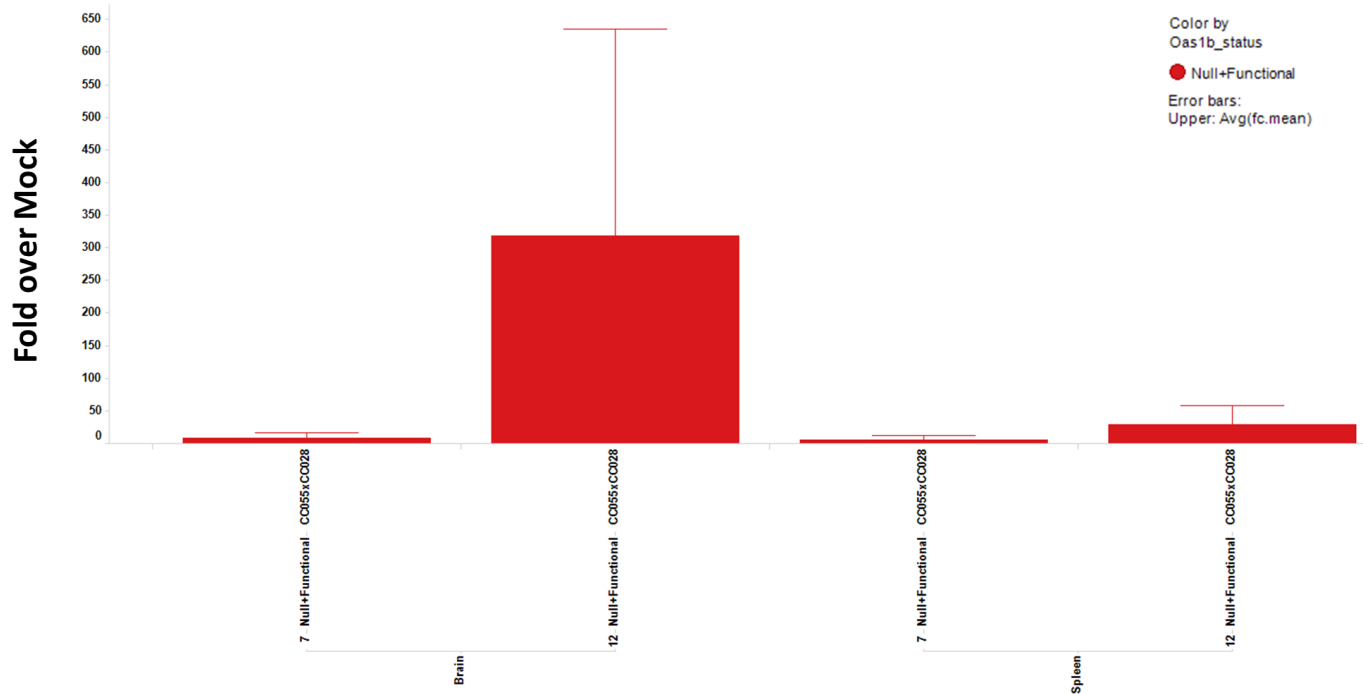

**Figure S5. qPCR of WNV in CC(055x028)/F1 at days' 7 and 12 in the brain and spleen.**

The y-axis shows fold change over mock for RIX CC(055x028)/F1. The x-axis shows days' post infection (2, ,4 ,7). The top part of the figure is spleen and the lower part is brain. The color here represents its haplotype (Red=N/F).

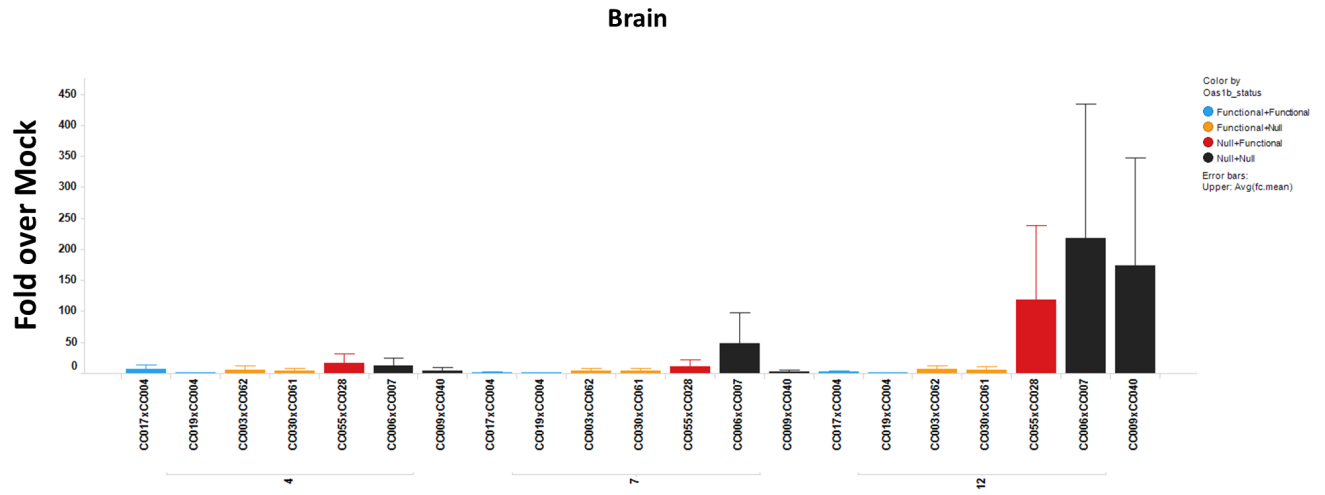

**Figure S6. qPCR of WNV in the brain of selected CC RIX lines at day 4, 7, and 12 post infection**

The y-axis shows fold change over mock in the RIX lines selected for transcriptomics. The x-axis shows days' post infection (4, 7, 12). Each color represents a different Oas1b designation. Blue=F/F, Orange=F/N, Red=N/F, Black=N/N.

| Associated Gene Name | Gene Start (bp) | Gene End (bp) | WikiGene Description                                                 | WikiGene Name |
|----------------------|-----------------|---------------|----------------------------------------------------------------------|---------------|
| Rbm19                | 120116465       | 120198981     | RNA binding motif protein 19                                         | Rbm19         |
| Lhx5                 | 120431699       | 120441223     | LIM homeobox protein 5                                               | Lhx5          |
| Sdsl                 | 120458186       | 120472810     | serine dehydratase-like                                              | Sdsl          |
| Sds                  | 120476526       | 120483932     | serine dehydratase                                                   | Sds           |
| Plbd2                | 120483282       | 120503625     | phospholipase B domain containing 2                                  | Plbd2         |
| Slc8b1               | 120511168       | 120534024     | solute carrier family 8 (sodium/lithium/calcium exchanger), member 8 | Slc8b1        |
| Tpcn1                | 120534153       | 120588673     | two pore channel 1                                                   | Tpcn1         |
| Iqcd                 | 120589016       | 120607118     | IQ motif containing D                                                | Iqcd          |
| Rita1                | 120594305       | 120612589     | RBPJ interacting and tubulin associated 1                            | Rita1         |
| Ddx54                | 120612739       | 120628592     | DEAD (Asp-Glu-Ala-Asp) box polypeptide 54                            | Ddx54         |
| Cfap73               | 120628335       | 120634235     | cilia and flagella associated protein 73                             | Cfap73        |
| Rasa1                | 120648812       | 120679597     | RAS protein activator like 1 (GAP1 like)                             | Rasa1         |
| Dtx1                 | 120680202       | 120711927     | deltex 1, E3 ubiquitin ligase                                        | Dtx1          |
| Oas2                 | 120730333       | 120749853     | 2'-5' oligoadenylate synthetase 2                                    | Oas2          |
| Oas3                 | 120753098       | 120777661     | 2'-5' oligoadenylate synthetase 3                                    | Oas3          |
| Oas1e                | 120786226       | 120795530     | 2'-5' oligoadenylate synthetase 1E                                   | Oas1e         |
| Oas1c                | 120800194       | 120812514     | 2'-5' oligoadenylate synthetase 1C                                   | Oas1c         |
| Oas1b                | 120812635       | 120824163     | 2'-5' oligoadenylate synthetase 1B                                   | Oas1b         |
| Oas1f                | 120847367       | 120857986     | 2'-5' oligoadenylate synthetase 1F                                   | Oas1f         |
| Oas1h                | 120861421       | 120873506     | 2'-5' oligoadenylate synthetase 1H                                   | Oas1h         |
| Oas1g                | 120876142       | 120887613     | 2'-5' oligoadenylate synthetase 1G                                   | Oas1g         |
| Oas1a                | 120896256       | 120907521     | 2'-5' oligoadenylate synthetase 1A                                   | Oas1a         |
| Oas1d                | 120914536       | 120921652     | 2'-5' oligoadenylate synthetase 1D                                   | Oas1d         |
| Rph3a                | 120940499       | 121010092     | rabphilin 3A                                                         | Rph3a         |
| Ptpn11               | 121130533       | 121191397     | protein tyrosine phosphatase, non-receptor type 11                   | Ptpn11        |
| Rpl6                 | 121204481       | 121209241     | ribosomal protein L6                                                 | Rpl6          |
| Traf1                | 121371725       | 121385632     | TRAF type zinc finger domain containing 1                            | Traf1         |
| Naa25                | 121397936       | 121444378     | N(alpha)-acetyltransferase 25, NatB auxiliary subunit                | Naa25         |
| Erp29                | 121428590       | 121452506     | endoplasmic reticulum protein 29                                     | Erp29         |
| Tmem116              | 121451893       | 121524183     | transmembrane protein 116                                            | Tmem116       |
| Adam1b               | 121500098       | 121503435     | a disintegrin and metallopeptidase domain 1b                         | Adam1b        |
| Adam1a               | 121518576       | 121522071     | a disintegrin and metallopeptidase domain 1a                         | Adam1a        |
| Mapkapk5             | 121525038       | 121545905     | MAP kinase-activated protein kinase 5                                | Mapkapk5      |
| Aldh2                | 121566027       | 121593824     | aldehyde dehydrogenase 2, mitochondrial                              | Aldh2         |
| Acad12               | 121596775       | 121618938     | acyl-Coenzyme A dehydrogenase family, member 10                      | Acad10        |
| Acad10               | 121621026       | 121660514     | acyl-Coenzyme A dehydrogenase family, member 10                      | Acad10        |
| Brp                  | 121660563       | 121687256     | BRCA1 associated protein                                             | Brp           |
| Atxn2                | 121711337       | 121816493     | ataxin 2                                                             | Atxn2         |
| Sh2b3                | 121815488       | 121837646     | SH2B adaptor protein 3                                               | Sh2b3         |
| Fam109a              | 121848984       | 121854632     | family with sequence similarity 109, member A                        | Fam109a       |
| Cux2                 | 121856366       | 122050102     | cut-like homeobox 2                                                  | Cux2          |
| Myl2                 | 122100951       | 122113472     | myosin, light polypeptide 2, regulatory, cardiac, slow               | Myl2          |
| Ccdc63               | 122108040       | 122140823     | coiled-coil domain containing 63                                     | Ccdc63        |
| Ppp1cc               | 122158278       | 122175273     | protein phosphatase 1, catalytic subunit, gamma isoform              | Ppp1cc        |
| Hvcn1                | 122206804       | 122242297     | hydrogen voltage-gated channel 1                                     | Hvcn1         |
| Tctn1                | 122237848       | 122264460     | tectonic family member 1                                             | Tctn1         |
| Pptc7                | 122284365       | 122324281     | PTC7 protein phosphatase homolog                                     | Pptc7         |
| Rad9b                | 122323223       | 122354233     | RAD9 checkpoint clamp component B                                    | Rad9b         |
| Vps29                | 122354369       | 122364984     | VPS29 retromer complex component                                     | Vps29         |
| Fam216a              | 122364580       | 122372364     | family with sequence similarity 216, member A                        | Fam216a       |
| Gpn3                 | 122371876       | 122382902     | GPN-loop GTPase 3                                                    | Gpn3          |
| Arpc3                | 122391878       | 122414184     | actin related protein 2/3 complex, subunit 3                         | Arpc3         |
| Anapc7               | 122421693       | 122444912     | anaphase promoting complex subunit 7                                 | Anapc7        |
| Atp2a2               | 122453513       | 122502225     | ATPase, Ca <sup>++</sup> transporting, cardiac muscle, slow twitch 2 | Atp2a2        |
| Ift81                | 122550204       | 122614518     | intraflagellar transport 81                                          | Ift81         |

**Table S1. QTL gene table**

A list of known genes identified in our day 12 weight loss QTL (2.5 megabases). This list excluded predicted genes.

| Immune Related Pathways                                                      | -log(p-value) | Molecules                                                       |
|------------------------------------------------------------------------------|---------------|-----------------------------------------------------------------|
| Role of Pattern Recognition Receptors in Recognition of Bacteria and Viruses | 8.38E00       | OAS1,Oas1h,PTPN11,OAS2,Oas1d (includes others),Oas1b,Oas1f,OAS3 |
| Calcium Signaling                                                            | 2.8E00        | MYL2,ATP2A2,SLC8B1,CAMKK2                                       |
| Protein Kinase A Signaling                                                   | 2.3E00        | Ppp1cc,PTPN11,MYL2,ANAPC5,ANAPC7                                |
| Role of JAK2 in Hormone-like Cytokine Signaling                              | 2.38E00       | PTPN11,SH2B3                                                    |
| Dopamine-DARPP32 Feedback in cAMP Signaling                                  | 1.93E00       | Ppp1cc,ATP2A2,CAMKK2                                            |
| Mitotic Roles of Polo-Like Kinase                                            | 1.8E00        | ANAPC5,ANAPC7                                                   |
| Integrin Signaling                                                           | 1.59E00       | PTPN11,MYL2,ARPC3                                               |
| Regulation of Actin-based Motility by Rho                                    | 1.58E00       | MYL2,ARPC3                                                      |
| Actin Cytoskeleton Signaling                                                 | 1.55E00       | PTPN11,MYL2,ARPC3                                               |
| PAK Signaling                                                                | 1.46E00       | PTPN11,MYL2                                                     |
| Signaling by Rho Family GTPases                                              | 1.45E00       | PTPN11,MYL2,ARPC3                                               |
| Gustation Pathway                                                            | 1.37E00       | P2RX4,P2RX7                                                     |
| Rac Signaling                                                                | 1.33E00       | PTPN11,ARPC3                                                    |
| RhoA Signaling                                                               | 1.32E00       | MYL2,ARPC3                                                      |
| fMLP Signaling in Neutrophils                                                | 1.31E00       | PTPN11,ARPC3                                                    |
| CD28 Signaling in T Helper Cells                                             | 1.28E00       | PTPN11,ARPC3                                                    |
| Inflammasome pathway                                                         | 1.26E00       | P2RX7                                                           |

**Table S2. Table of pathways found enriched in QTL (4 megabases)**

A list of known pathways within the large QTL identified with other phenotypes (see table 1).
